# Supplementary material
Source: PubMed Central journal article supplement (PMC11575660)
Supplement: NA-006-D4NA00754A-s001.pdf [file NA-006-D4NA00754A-s001.pdf]

## Supporting Information

### **Unveiling the potential of MXene fabricated catalysts: An effective approach for H<sub>2</sub> generation from water splitting†**

*Muhammad Zeeshan Abid<sup>a</sup>, Khezina Rafiq<sup>a\*</sup>, Abdul Rauf<sup>a</sup>, Ejaz Hussain<sup>a\*</sup>*

<sup>a</sup>Institute of Chemistry, Inorganic Materials Laboratory 52S, The Islamia University of Bahawalpur–63100, Pakistan.

Corresponding authors email: [ejaz.hussain@iub.edu.pk](mailto:ejaz.hussain@iub.edu.pk); [khezina.rafiq@iub.edu.pk](mailto:khezina.rafiq@iub.edu.pk)

**Materials:** The following chemicals were used during this study:  $\text{TiAl}_3\text{C}_2$  (Foreman Scientific–china). 40% Hydrofluoric acid (MERK) and absolute ethanol (Sigma Aldrich) and distilled water (PAEC–PK).

**Characterizations:** Various characterization techniques were employed to comprehensively investigate the catalyst properties and features in order to optimize their performance. X–ray diffraction (XRD) analysis was conducted using a Bruker D2–Phaser instrument to investigate the structural characteristics of the synthesized catalysts. The scan was performed in the  $2\theta$  range of  $5\text{--}80^\circ$  with a scan rate of  $2^\circ \text{ min}^{-1}$ . Raman results were recorded using a Raman spectrometer RMP–500/JASCO. Fourier transform infrared (FTIR) results were collected in the  $400\text{--}4000 \text{ cm}^{-1}$  range using a Bruker Alpha Platinum infrared spectrometer in ATR mode. To examine the stability and oxidation behavior of MXene Thermogravimetric Analysis (TGA) was performed using a (TG–209) F–Tarsus NETZSCH Germany instrument. These analyses provide insights into the catalyst's atomic arrangements crystallographic properties and stability. To examine the surface morphology FEI–Nova–450 (Nano–SEM) was employed. The atomic force microscope (AFM–5500, Agilent/USA) was employed to investigate the surface topography at nanometer scale. The oxidation states and surface terminations were examined using an X–ray photoelectron spectrometer (Thermo–ESCALAB 250–Xi) coupled with an Al Ka X–ray source (1486.6 eV). The Optical properties and bandgap were analyzed through diffuse reflectance spectroscopy using UV–2550/Shimadzu. Photoluminescence (PL) spectra were obtained using an LS–45 Perkin Elmer spectrometer. Electrochemical impedance spectroscopy (EIS) analysis was performed using a Solartron impedance analyzer–1260. Photoresponse were monitored using a conventional three–electrode system ( $\lambda > 420 \text{ nm}$ ). Specific surface areas and pore

volumes of the catalysts were determined by Micromeritics Tristar/II-3020 analyzer based on the Brunauer–Emmett–Teller method.

**Table S1:** The XRD parameters ( $2\theta$  and corresponding  $hkl$  values) of  $\text{Ti}_3\text{AlC}_2$ ,  $\text{Ti}_3\text{C}_2\text{T}_x$ ,  $\text{TiO}_2@\text{Ti}_3\text{C}_2\text{T}_x$  and  $\text{TiO}_2@\text{C}$ .

| $\text{Ti}_3\text{AlC}_2$ |       | $\text{Ti}_3\text{C}_2\text{T}_x$ |       | $\text{TiO}_2@\text{Ti}_3\text{C}_2\text{T}_x$ |       | $\text{TiO}_2@\text{C}$ |       |
|---------------------------|-------|-----------------------------------|-------|------------------------------------------------|-------|-------------------------|-------|
| $2\theta$                 | $hkl$ | $2\theta$                         | $hkl$ | $2\theta$                                      | $hkl$ | $2\theta$               | $hkl$ |
| 9.52                      | 002   | 9.37                              | 002   | 9.19                                           | 002   | 25.52                   | 101   |
| 19.06                     | 004   | 18.51                             | 006   | 18.30                                          | 006   | 37.12                   | 103   |
| 33.99                     | 101   | 27.88                             | 008   | 25.40                                          | 101   | 38.08                   | 004   |
| 36.74                     | 103   | 60.92                             | 110   | 27.57                                          | 008   | 48.20                   | 200   |
| 39.04                     | 104   |                                   |       | 37.81                                          | 004   | 54.13                   | 105   |
| 41.82                     | 105   |                                   |       | 48.15                                          | 200   | 55.14                   | 211   |
| 48.38                     | 107   |                                   |       | 53.98                                          | 105   | 62.75                   | 204   |
| 56.30                     | 109   |                                   |       | 55.07                                          | 211   | 69.04                   | 116   |
| 60.26                     | 110   |                                   |       | 60.68                                          | 110   | 70.23                   | 220   |
|                           |       |                                   |       | 62.79                                          | 204   | 75.11                   | 215   |

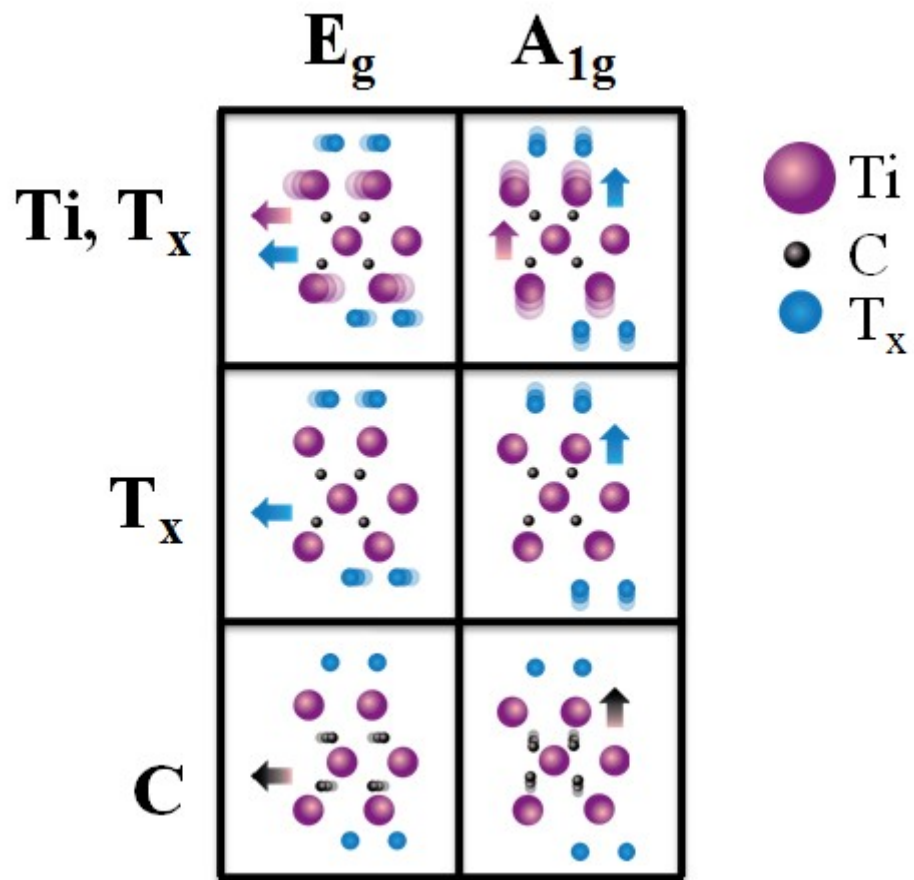

**Figure S1:** Raman vibrations modes in  $Ti_3C_2T_x$ .

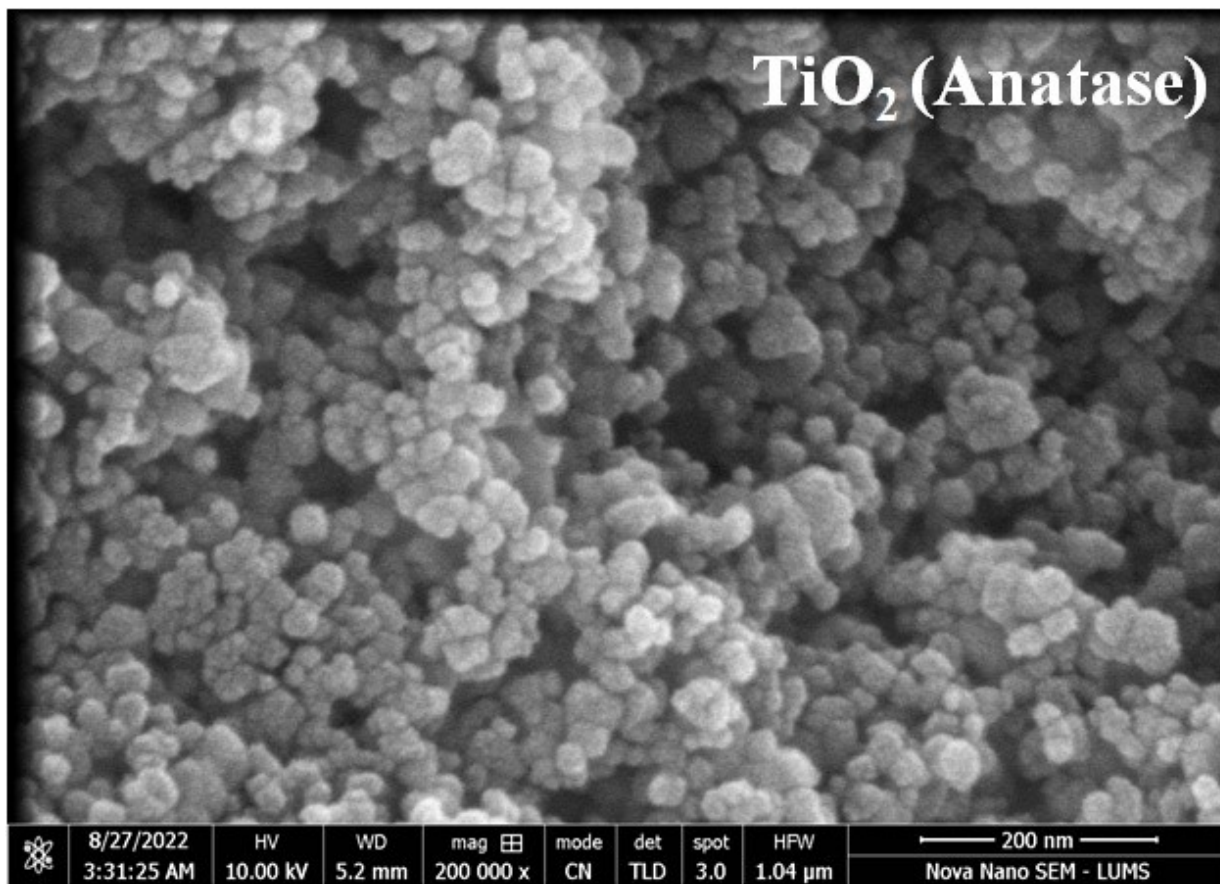

**Figure S2:** SEM results of pristine TiO<sub>2</sub> at 200 nm.

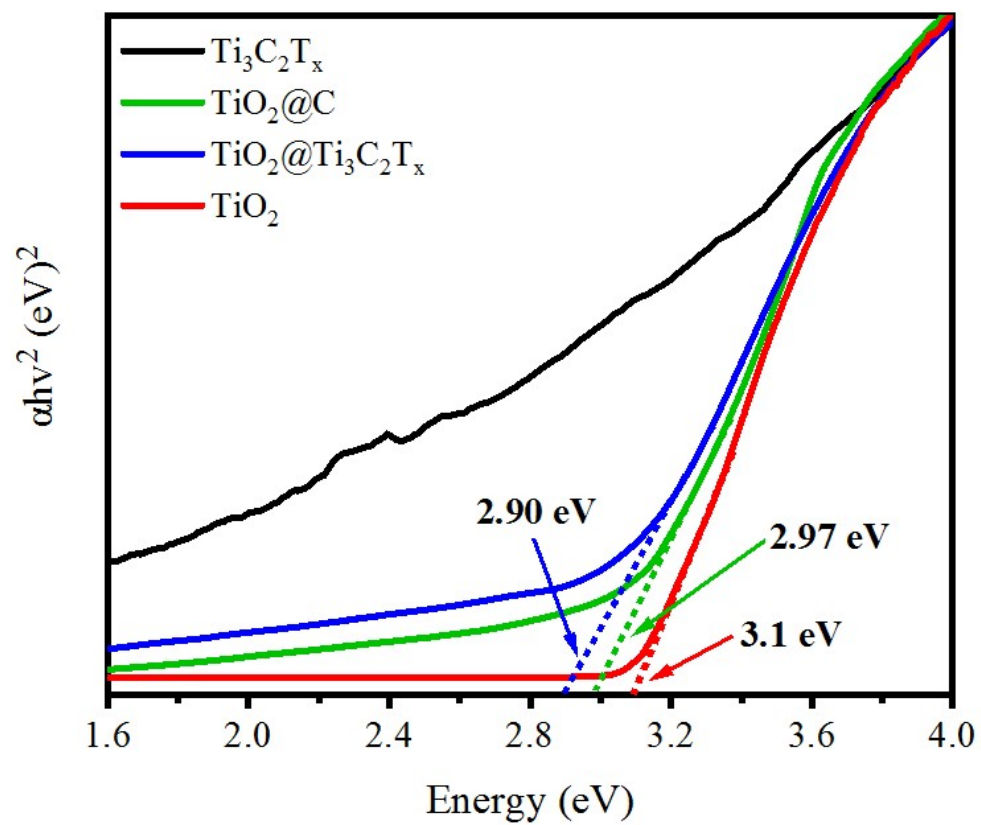

**Figure S3:** The Tauc plot for bandgap energies of  $\text{TiO}_2$ ,  $\text{TiO}_2@\text{Ti}_3\text{C}_2\text{T}_x$  and  $\text{TiO}_2@\text{C}$  catalysts.

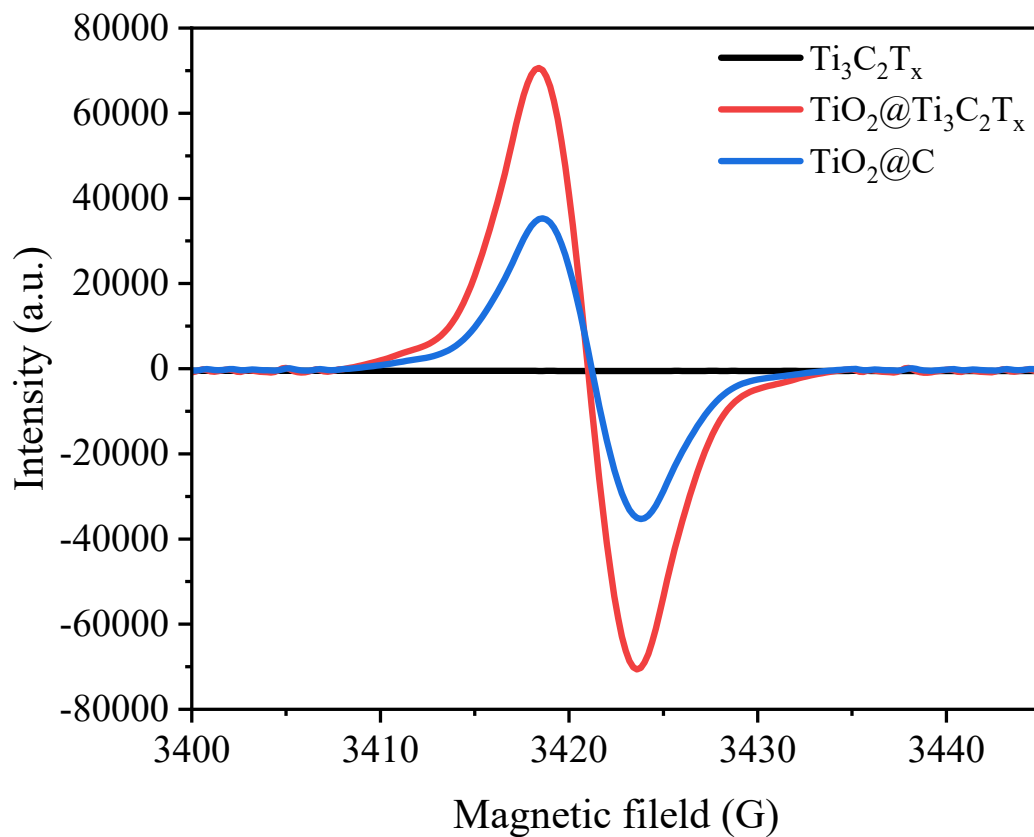

**Figure S4:** EPR results of  $\text{Ti}_3\text{C}_2\text{T}_x$ ,  $\text{TiO}_2@\text{Ti}_3\text{C}_2\text{T}_x$  and  $\text{TiO}_2@\text{C}$  catalysts.

**Table S2:** Magnetic parameters Magnetic saturation, Residual magnetic intensity, Coercivity and Squareness ratio of as-synthesized catalysts.

| <b>Magnetic Parameters</b>               | <b>Ti<sub>3</sub>C<sub>2</sub>T<sub>x</sub></b> | <b>TiO<sub>2</sub>@C</b> | <b>TiO<sub>2</sub>@Ti<sub>3</sub>C<sub>2</sub>T<sub>x</sub></b> |
|------------------------------------------|-------------------------------------------------|--------------------------|-----------------------------------------------------------------|
| Magnetic saturation (MS) (emu/g)         | 0.076                                           | 0.291                    | 0.241                                                           |
| Residual magnetic intensity (Mr) (emu/g) | 0.030                                           | 0.071                    | 0.064                                                           |
| Coercivity (Hc) (G)                      | 518                                             | 127                      | 271                                                             |
| Squareness ratio                         | 0.394                                           | 0.2439                   | 0.265                                                           |

**Table S3:** The comparison of H<sub>2</sub> evolution rate TiO<sub>2</sub>, TiO<sub>2</sub>@C and TiO<sub>2</sub>@Ti<sub>3</sub>C<sub>2</sub>T<sub>x</sub> catalysts.

| <b>Sr. No.</b> | <b>Photocatalyst</b>                                            | <b>H<sub>2</sub> (mmol g<sup>-1</sup>)</b> | <b>H<sub>2</sub> (μmol h<sup>-1</sup>)</b> | <b>H<sub>2</sub> (mmol g<sup>-1</sup>h<sup>-1</sup>)</b> | <b>AQY (%)</b> |
|----------------|-----------------------------------------------------------------|--------------------------------------------|--------------------------------------------|----------------------------------------------------------|----------------|
| <b>1</b>       | TiO <sub>2</sub>                                                | 21.95                                      | 73.00                                      | 3.65                                                     | 0.9            |
| <b>2</b>       | TiO <sub>2</sub> @C                                             | 56.23                                      | 187.4                                      | 9.37                                                     | 2.56           |
| <b>3</b>       | TiO <sub>2</sub> @Ti <sub>3</sub> C <sub>2</sub> T <sub>x</sub> | 111.43                                     | 371.4                                      | 18.57                                                    | 5.67           |



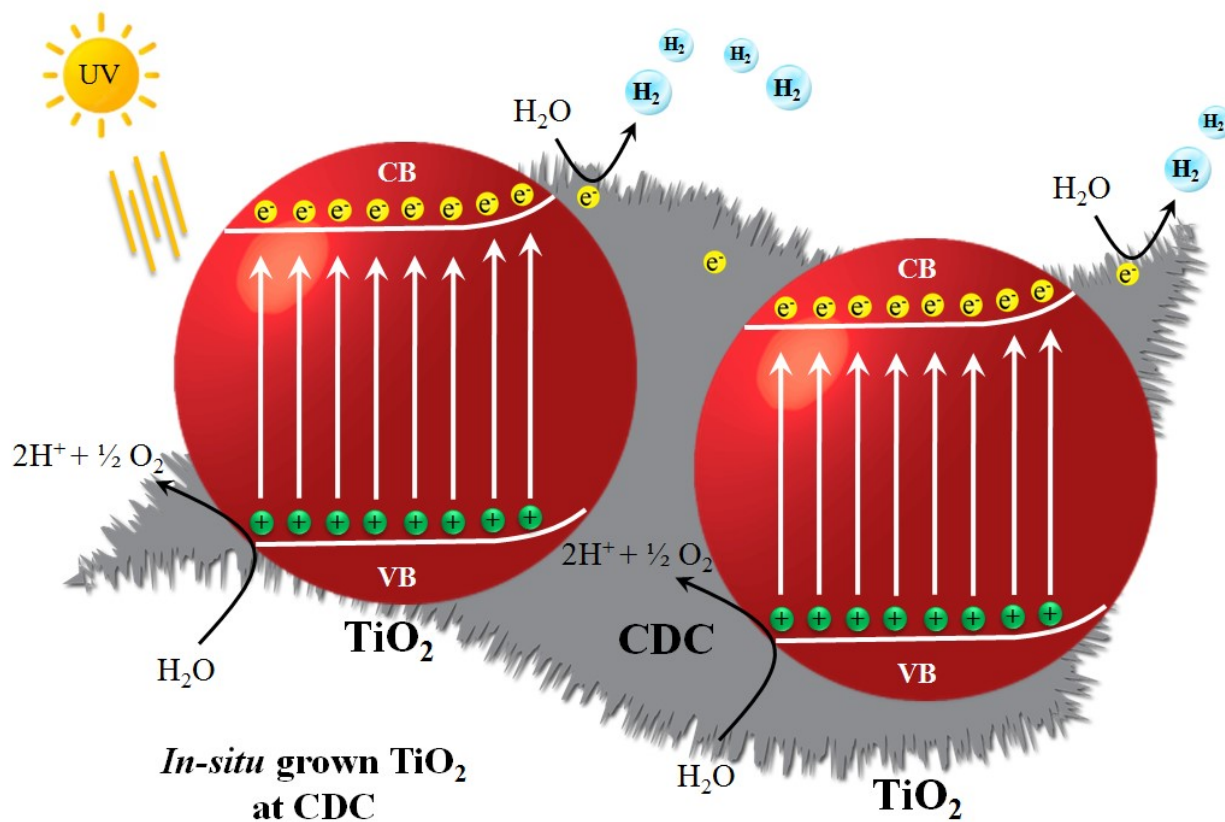

**Figure S5:** Carbide derived carbon (CDC) layer facilitate the water splitting reaction on TiO<sub>2</sub>.
